# Supplementary material
Source: PubMed Central journal article supplement (PMC4351667)
Supplement: supp_WNL.0000000000001309_Supplemental_data.pdf [file supp_WNL.0000000000001309_Supplemental_data.pdf]

## Supplementary materials

### Common variation in *COL4A1/COL4A2* is associated with sporadic cerebral small vessel disease

Materials included.

- Supplementary table e-1: Cohort characteristics and summary statistics.
- Supplementary table e-2: Original measures of association and imputation quality
  - A. Original measures of association ( $\beta$ ) and the derived odds ratios (ORs).
  - B. Imputed and directly genotyped SNPs.
- Supplementary table e-3: Functional annotations.
  - A. Functional annotation of SNPs in moderate LD ( $r^2 > 0.3$ ) with rs9521732, rs9521733 and rs9515199.
  - B. Functional annotation of SNPs in high LD ( $r^2 > 0.9$ ) with rs9521732, rs9521733 and rs9515199: Regulome db database results.
- Reference list

Supplementary table e-1. Cohort characteristics and summary statistics

| A. Cohorts contributing data for the ICH phenotype |                                                                                                                                                                                                                                                                                                 |                                                            |                                                                                                                                                                    |
|----------------------------------------------------|-------------------------------------------------------------------------------------------------------------------------------------------------------------------------------------------------------------------------------------------------------------------------------------------------|------------------------------------------------------------|--------------------------------------------------------------------------------------------------------------------------------------------------------------------|
| Cohort name                                        | GOCHA                                                                                                                                                                                                                                                                                           | ISGC                                                       | GERFHS                                                                                                                                                             |
|                                                    | STUDY INFORMATION                                                                                                                                                                                                                                                                               |                                                            |                                                                                                                                                                    |
| Study design                                       | Prospective hospital-based case-control                                                                                                                                                                                                                                                         | 3 separate prospective hospital-based case-control cohorts | Prospective population-based case-control                                                                                                                          |
| Study inclusion and exclusion criteria             | Included: primary acute ICH cases presenting to participating centers, aged >55 years, confirmation of primary ICH on CT. Excluded: warfarin-, trauma-, brain tumor-, vascular malformation related ICH, hemorrhagic transformation of ischemic stroke, other secondary causes.                 |                                                            | Included: spontaneous ICH in the Greater Cincinnati/ Northern Kentucky region; age ≥18 years. Excluded: trauma-, brain tumour-, vascular malformation related ICH. |
| ICH diagnosis criteria                             | Non-traumatic abrupt onset of severe headache, altered level of consciousness, and/or focal neurological deficit that is associated with a focal collection of blood within the brain parenchyma as observed on CT or at autopsy and is not due to hemorrhagic transformation of an infarction. |                                                            |                                                                                                                                                                    |
| Deep ICH diagnosis criteria                        | Involving predominantly the basal ganglia, periventricular white matter, or internal capsule, and infratentorial ICH                                                                                                                                                                            |                                                            |                                                                                                                                                                    |
| Lobar ICH diagnosis criteria                       | Involving predominantly the cortex and underlying white matter                                                                                                                                                                                                                                  |                                                            |                                                                                                                                                                    |
| Key study references                               | Falcone et al. Stroke 2013(1)                                                                                                                                                                                                                                                                   | Woo et al. Am J Hum Genet 2014(2)                          | Woo et al. Stroke 2002(3)                                                                                                                                          |
|                                                    | SUBJECTS' CHARACTERISTICS                                                                                                                                                                                                                                                                       |                                                            |                                                                                                                                                                    |
| Ancestry of study sample                           | European descent                                                                                                                                                                                                                                                                                |                                                            |                                                                                                                                                                    |
| Total number of ICH cases                          | 298                                                                                                                                                                                                                                                                                             | 450                                                        | 797                                                                                                                                                                |
| Age of all cases with ICH (mean ± SD)              | 74 ±10                                                                                                                                                                                                                                                                                          | 72 ±12                                                     | 67 ±15                                                                                                                                                             |
| Number of deep ICH cases                           | 125                                                                                                                                                                                                                                                                                             | 279                                                        | 470                                                                                                                                                                |
| Age of cases with deep ICH (mean ± SD)             | 71 ±13                                                                                                                                                                                                                                                                                          | 69 ±14                                                     | 65 ±16                                                                                                                                                             |
| Number of lobar ICH cases                          | 173                                                                                                                                                                                                                                                                                             | 171                                                        | 327                                                                                                                                                                |
| Age of cases with lobar ICH (mean ± SD)            | 76 ±11                                                                                                                                                                                                                                                                                          | 74 ±13                                                     | 71 ±12                                                                                                                                                             |
| Number of controls                                 | 457                                                                                                                                                                                                                                                                                             | 489                                                        | 539                                                                                                                                                                |

| A. Cohorts contributing data for the ICH phenotype                 |                                                                                                                                                                                                                            |             |                |
|--------------------------------------------------------------------|----------------------------------------------------------------------------------------------------------------------------------------------------------------------------------------------------------------------------|-------------|----------------|
| Cohort name                                                        | GOCHA                                                                                                                                                                                                                      | ISGC        | GERFHS         |
| Age of controls (mean $\pm$ SD)                                    | 72 $\pm$ 8                                                                                                                                                                                                                 | 73 $\pm$ 12 | 66 $\pm$ 15    |
| GENOTYPING INFORMATION                                             |                                                                                                                                                                                                                            |             |                |
| GWAS panel used                                                    | Illumina HumanHap 610 Quad                                                                                                                                                                                                 |             | Affymetrix 6.0 |
| QC steps done before imputation                                    | QC steps before imputation done in every centre, including removal of population outliers, missing data and HWE departures                                                                                                 |             |                |
| Imputation software                                                | IMPUTE2 ( <a href="https://mathgen.stats.ox.ac.uk/impute/impute_v2.html">https://mathgen.stats.ox.ac.uk/impute/impute_v2.html</a> )                                                                                        |             |                |
| Which reference imputation done to                                 | 1000-genomes (June 2011)                                                                                                                                                                                                   |             |                |
| Imputation quality metric reported                                 | IMPUTE info score & PLINK info score ( <a href="http://pngu.mgh.harvard.edu/~purcell/plink/">http://pngu.mgh.harvard.edu/~purcell/plink/</a> )                                                                             |             |                |
| QC filtering applied to imputed variants                           | Removed SNPs with PLINK info score of $<0.7$ and minimum allele frequency (MAF) $<1\%$                                                                                                                                     |             |                |
| Software and statistical model used for association analyzed       | PLINK<br>ICH = $b_0 + b_1 \cdot \text{SNP} + b_2 \cdot \text{age} + b_3 \cdot \text{sex} + b_4 \cdot \text{PC1} \dots \text{PC4}$                                                                                          |             |                |
| Handling of population stratification                              | Principal component (PC) analysis. Removal of population outliers by visual inspection of PC1*PC2 plot, followed by inclusion of PC1-PC4 in regression models                                                              |             |                |
| Hardy Weinberg Equilibrium (HWE)                                   | Excluded if HWE $p < 1 \times 10^{-6}$                                                                                                                                                                                     |             |                |
| Adjusting for cryptic or overt relatedness                         | Excluded individuals with an inferred first- or second-degree relative in the sample identified on the basis of pairwise allele sharing estimates (estimated genome proportion shared identical by descent) $\pi > 0.1875$ |             |                |
| Strand and build of the human genome on which results are provided | + strand, build 37/hg19                                                                                                                                                                                                    |             |                |

GOCHA: Genetics of Cerebral Hemorrhage with Anticoagulation; ISGC: International Stroke Genetics Consortium; GERFHS: Genetic and Environmental Risk Factors for Hemorrhagic Stroke

| B. Cohorts contributing data for the ischemic stroke phenotype |                                                                                                                                                                                                           |                  |                          |                |                  |                     |                 |               |                |                  |                     |                    |                        |                   |                   |
|----------------------------------------------------------------|-----------------------------------------------------------------------------------------------------------------------------------------------------------------------------------------------------------|------------------|--------------------------|----------------|------------------|---------------------|-----------------|---------------|----------------|------------------|---------------------|--------------------|------------------------|-------------------|-------------------|
| Cohort name                                                    | WTCCC<br>2_UK                                                                                                                                                                                             | WTCCC<br>2_D     | ISGS &<br>SWISS          | Rotter-<br>dam | Milano           | ARIC                | ASGC            | Brains        | CHS            | deCODE           | FHS                 | GASROS             | GEOS                   | HPS               | HVH               |
|                                                                | STUDY INFORMATION                                                                                                                                                                                         |                  |                          |                |                  |                     |                 |               |                |                  |                     |                    |                        |                   |                   |
| Study design <sup>1</sup>                                      | CS                                                                                                                                                                                                        | CS               | CS                       | PB             | CS               | PB                  | CS              | CS            | PB             | CS               | PB                  | CS                 | CS                     | CS                | CS                |
| Inclusion and exclusion criteria                               | Included: Patients with ischemic stroke who were of European ancestry from Europe, North America, and Australia, together with controls of matched ancestry. All studies used a case-control methodology. |                  |                          |                |                  |                     |                 |               |                |                  |                     |                    |                        |                   |                   |
| IS definition                                                  | Stroke was defined as a typical clinical syndrome with radiological confirmation. Stroke subtyping was done with the TOAST classification system.                                                         |                  |                          |                |                  |                     |                 |               |                |                  |                     |                    |                        |                   |                   |
| Reference                                                      | Traylor et al, Lancet Neurology 2012(4)                                                                                                                                                                   |                  |                          |                |                  |                     |                 |               |                |                  |                     |                    |                        |                   |                   |
|                                                                | SUBJECTS' CHARACTERISTICS                                                                                                                                                                                 |                  |                          |                |                  |                     |                 |               |                |                  |                     |                    |                        |                   |                   |
| Ancestry of study sample                                       | European ancestry (from Europe, North-America, Australia)                                                                                                                                                 |                  |                          |                |                  |                     |                 |               |                |                  |                     |                    |                        |                   |                   |
| Total no.cases/con<br>trols                                    | 2374/<br>5175                                                                                                                                                                                             | 1174/<br>797     | 1070/<br>2329            | 367/<br>5396   | 372/<br>407      | 385/<br>8803        | 1162/<br>1244   | 361/<br>444   | 454/<br>2817   | 2391/<br>26970   | 171/<br>4164        | 516/<br>1202       | 448/<br>498            | 578/<br>468       | 566/<br>1290      |
| No. CE cases                                                   | 460                                                                                                                                                                                                       | 330              | 247                      | -              | 65               | 93                  | 240             | 29            | 147            | 399              | 48                  | 169                | 90                     | -                 | 88                |
| No. LVD cases                                                  | 498                                                                                                                                                                                                       | 346              | 229                      | -              | 74               | 31                  | 421             | 120           | -              | 255              | -                   | 95                 | 37                     | -                 | 61                |
| No. SVD cases                                                  | 474                                                                                                                                                                                                       | 106              | 201                      | -              | 25               | 63                  | 310             | 97            | 73             | 240              | -                   | 38                 | 54                     | -                 | 173               |
| Age of cases and controls (mean ± SD)                          | 72±13/ 52 <sup>2</sup>                                                                                                                                                                                    | 67 ±13/<br>63±11 | 67±14/<br>65±13          | 71±8/<br>69±9  | 57±16/<br>51±8   | 57±5/<br>54±6       | 73±13/<br>70±12 | 74±14/<br>≥65 | 82±6/<br>86±6  | 73±12/<br>57±21  | 80±11/<br>72±12     | 67±15/<br>48±9     | 41±7/<br>40±7          | 65±8/<br>59±9     | 69±9<br>/<br>67±9 |
|                                                                | GENOTYPING INFORMATION                                                                                                                                                                                    |                  |                          |                |                  |                     |                 |               |                |                  |                     |                    |                        |                   |                   |
| GWAS panel used                                                | Illumina 660                                                                                                                                                                                              |                  | Illumina 550/610/<br>660 | Illumina 550   | Illumina 610/660 | Affy-<br>metrix 6.0 | Illumina 610    |               | Illumina 370   | Illumina 317/370 | Affy-<br>metrix 550 | Affymetr<br>ix 6.0 | Illumi<br>na H<br>Omni | Illu-<br>mina 610 | Illu-<br>mina 370 |
| QC filters applied before imputation                           | QC steps before imputation done in every center, including removal of ancestry outliers defined by principal component analysis and poorly typed individuals.                                             |                  |                          |                |                  |                     |                 |               |                |                  |                     |                    |                        |                   |                   |
| Imputation software                                            | MaCH<br><a href="http://www.sph.umich">http://www.sph.umich</a> .                                                                                                                                         |                  | MaCH v1.0.16             | MaCH           |                  | MaCH v1.0.16        |                 |               | BIM-<br>BAM(5) | IMPUTE           | MaCH v1.0.15        | MaCH v1.0.16       | Not impute             | MaC<br>H          | BIM-<br>BAM       |

| B. Cohorts contributing data for the ischemic stroke phenotype |                                                                                                                                                                                                                                                                                                                                                                                                                 |              |                  |                |             |             |                 |        |           |             |            |                               |             |             |           |
|----------------------------------------------------------------|-----------------------------------------------------------------------------------------------------------------------------------------------------------------------------------------------------------------------------------------------------------------------------------------------------------------------------------------------------------------------------------------------------------------|--------------|------------------|----------------|-------------|-------------|-----------------|--------|-----------|-------------|------------|-------------------------------|-------------|-------------|-----------|
| Cohort name                                                    | WTCCC<br>2_UK                                                                                                                                                                                                                                                                                                                                                                                                   | WTCCC<br>2_D | ISGS &<br>SWISS  | Rotter-<br>dam | Milano      | ARIC        | ASGC            | Brains | CHS       | deCODE      | FHS        | GASROS                        | GEOS        | HPS         | HVH       |
|                                                                | <a href="http://edu.csg.abecasis/MACH/download/">edu/csg/abecasis/MACH/download/</a>                                                                                                                                                                                                                                                                                                                            |              |                  |                |             |             |                 |        |           |             |            |                               | d           |             |           |
| Reference imputed to                                           | HapMap2 CEU                                                                                                                                                                                                                                                                                                                                                                                                     |              | 1000G (Aug 2010) | HapMap#22      | HapMap2 CEU | HapMap2 CEU | HapMap2 #24 CEU |        | NCBI b35  | HapMap2 CEU | HapMap #22 | HapMap 3 CEU+TSI training set | Not imputed | HapMap2 #22 |           |
| Imputation quality metric reported                             | MaCH oevar <sup>3</sup>                                                                                                                                                                                                                                                                                                                                                                                         |              |                  |                |             |             |                 |        | O/E ratio | IMPUTE info | MaCH oevar |                               | n/a         | MaCH oevar  | O/E ratio |
| QC filtering applied to imputed variants                       | Included SNPs with imputation quality ≥0.3 (O/E variance or IMPUTE info score) and MAF ≥1%                                                                                                                                                                                                                                                                                                                      |              |                  |                |             |             |                 |        |           |             |            |                               |             |             |           |
| Software and statistical model used for association analyzed   | Logistic regression for all cohorts with a cross-sectional study design to model the multiplicative SNP effects on risk of the dichotomous outcome of stroke against ancestry-matched controls. Cox proportional-hazards models for prospective studies to assess time to first stroke, fitting an additive model relating genotype dose to the stroke outcome.                                                 |              |                  |                |             |             |                 |        |           |             |            |                               |             |             |           |
| Handling of population stratification                          | Four cohorts used ancestry-informative principal components as covariates to correct for population stratification (ISGS/SWISS, GEOS, ASGC, Brains). Age and sex were included as covariates in two centers (ISGS/SWISS and Brains), sex was used as a covariate in one center (GASROS) and one center used recruitment phase (1 or 2) as a covariate (GEOS). In all other centers no covariates were included. |              |                  |                |             |             |                 |        |           |             |            |                               |             |             |           |
| HWE                                                            | All centers screened SNPs for HWE errors prior to imputation or analysis                                                                                                                                                                                                                                                                                                                                        |              |                  |                |             |             |                 |        |           |             |            |                               |             |             |           |
| Adjusting for cryptic or overt relatedness                     | All centers screened individuals for relatedness prior to imputation or analysis                                                                                                                                                                                                                                                                                                                                |              |                  |                |             |             |                 |        |           |             |            |                               |             |             |           |

<sup>1</sup>CS: cross sectional study; PB:population-based study.

<sup>2</sup>The approximate age of genotyping of the 2738 controls from the 1958 Birth Cohort. Age was not available for the remaining controls.

<sup>3</sup>MaCH oevar: the measure is the ratio of the empirically observed variance of the allele dosage to the expected binomial variance at Hardy–Weinberg equilibrium

WTCCC2: Wellcome Trust Case Control Consortium 2; UK: The United Kingdom of Great Britain and Northern Ireland; D: Germany; ISGS: Ischemic Stroke Genetics Study; SWISS: Sibling with Ischaemic Stroke Study; ARIC: Atherosclerosis Risk in Communities study; ASGC: Australian Stroke Genetics Collaborative; BRAINS: Bio-Repository of DNA in stroke; CHS: Cardiovascular Health Study; FHS: Framingham Heart Study; GASROS: Genes Affecting Stroke Risk and Outcome Study; GEOS: Genetics of Early-Onset Stroke; HPS: Heart Protection Study; HVH: Heart and Vascular Health Study

| C. Cohorts contributing data for the WMH in ischemic stroke phenotype |                                                                                                                                                                                                                                                                                                                |                        |       |      |                                                                                                                                                                                                                                                                               |                              |                                 |                                      |           |                                                           |                                                                 |
|-----------------------------------------------------------------------|----------------------------------------------------------------------------------------------------------------------------------------------------------------------------------------------------------------------------------------------------------------------------------------------------------------|------------------------|-------|------|-------------------------------------------------------------------------------------------------------------------------------------------------------------------------------------------------------------------------------------------------------------------------------|------------------------------|---------------------------------|--------------------------------------|-----------|-----------------------------------------------------------|-----------------------------------------------------------------|
| Cohort name                                                           | ASGC                                                                                                                                                                                                                                                                                                           | GASROS                 | SWISS | ISGS | Edinburgh                                                                                                                                                                                                                                                                     | Milano                       | SGUL                            | Oxford FLAIR                         | Oxford T2 | Munich FLAIR                                              | Munich T2                                                       |
|                                                                       | STUDY INFORMATION                                                                                                                                                                                                                                                                                              |                        |       |      |                                                                                                                                                                                                                                                                               |                              |                                 |                                      |           |                                                           |                                                                 |
| Study design <sup>1</sup>                                             | HB                                                                                                                                                                                                                                                                                                             | HB                     | HB    | HB   | HB                                                                                                                                                                                                                                                                            | HB                           | HB                              | PB                                   | PB        | HB                                                        | HB                                                              |
| Study inclusion and exclusion criteria                                | <p>Included: age &gt;18 years; diagnosis of ischemic stroke of any subtype</p> <p>Excluded: cases of CADASIL, vasculitis, demyelinating and mitochondrial disorders</p>                                                                                                                                        |                        |       |      |                                                                                                                                                                                                                                                                               |                              |                                 |                                      |           |                                                           |                                                                 |
| WMH quantification method used                                        | WMH assessed in hemisphere contralateral to acute ischemic stroke. All supratentorial WM lesions were included in WMH volume (WMHV) with the exception of WMH corresponding to lacunar infarcts; sequential axial FLAIR images analyzed using a validated, semi-automated protocol (MRICro, Un. of Nottingham) |                        |       |      | WMH assessed in the hemisphere contralateral to acute ischemic stroke. All supratentorial white matter lesions were included in WMH volume (WMHV) with the exception of WMH corresponding to lacunar infarcts; Analyzed using DISPunc semi-automated lesion drawing software. |                              |                                 |                                      |           |                                                           |                                                                 |
| MRI scanner used                                                      | 1.5 T Siemens Magnetom Avanto                                                                                                                                                                                                                                                                                  | 1.5 T GE Medical Signa |       |      | 1.5T GE Medical Signa, 1.5 T Siemens                                                                                                                                                                                                                                          | 1.5T Siemens, 0.5T Philips   | 1.5 T Philips, 1.5T GE Signa LX | 1.5T GE Medical Signa, 1.5 T Philips |           | 1.5T Siemens Magnetom, 1T Siemens, 1.5 T GE Medical Signa | 1.5T Siemens Magnetom, 3T and 1.5T GE Medical Signa, 1T Siemens |
| MRI sequence used for assessing WMH                                   | Axial FLAIR                                                                                                                                                                                                                                                                                                    |                        |       |      | Axial FLAIR                                                                                                                                                                                                                                                                   | Coronal FLAIR or Axial FLAIR | Axial FLAIR                     | Coronal FLAIR                        | Axial T2  | Axial FLAIR                                               | Axial T2                                                        |
| Key study references                                                  | Adib-Samii et al, Stroke 2013; Rost et al Neurology 2010;(6, 7)                                                                                                                                                                                                                                                |                        |       |      |                                                                                                                                                                                                                                                                               |                              |                                 |                                      |           |                                                           |                                                                 |
|                                                                       | SUBJECTS' CHARACTERISTICS                                                                                                                                                                                                                                                                                      |                        |       |      |                                                                                                                                                                                                                                                                               |                              |                                 |                                      |           |                                                           |                                                                 |
| Ancestry of study sample                                              | European ancestry                                                                                                                                                                                                                                                                                              |                        |       |      |                                                                                                                                                                                                                                                                               |                              |                                 |                                      |           |                                                           |                                                                 |

| C. Cohorts contributing data for the WMH in ischemic stroke phenotype |                                                                                                 |                                                                                                         |                                                          |                                                          |                                                                                                                                                                           |                         |             |              |             |              |             |
|-----------------------------------------------------------------------|-------------------------------------------------------------------------------------------------|---------------------------------------------------------------------------------------------------------|----------------------------------------------------------|----------------------------------------------------------|---------------------------------------------------------------------------------------------------------------------------------------------------------------------------|-------------------------|-------------|--------------|-------------|--------------|-------------|
| Cohort name                                                           | ASGC                                                                                            | GASROS                                                                                                  | SWISS                                                    | ISGS                                                     | Edinburgh                                                                                                                                                                 | Milano                  | SGUL        | Oxford FLAIR | Oxford T2   | Munich FLAIR | Munich T2   |
| Number of cases assessed for WMH                                      | 104                                                                                             | 975                                                                                                     | 115                                                      | 209                                                      | 65                                                                                                                                                                        | 152                     | 323         | 65           | 75          | 447          | 203         |
| Age of cases assessed for WMH (mean $\pm$ SD)                         | 65 $\pm$ 13                                                                                     | 66 $\pm$ 14                                                                                             | 66 $\pm$ 11                                              | 68 $\pm$ 14                                              | 69 $\pm$ 13                                                                                                                                                               | 58 $\pm$ 14             | 71 $\pm$ 13 | 65 $\pm$ 15  | 68 $\pm$ 13 | 66 $\pm$ 12  | 67 $\pm$ 12 |
| GENOTYPING INFORMATION                                                |                                                                                                 |                                                                                                         |                                                          |                                                          |                                                                                                                                                                           |                         |             |              |             |              |             |
| GWAS panel used                                                       | Human610-Quad                                                                                   | Affymetrix 6.0, Illumina Human610-Quad or Illumina OmniExpress beadchips                                | Illumina650K-Quad                                        | Illumina Human660 W-Quad                                 | Illumina Human610-Quad or Human660 W-Quad                                                                                                                                 | Illumina Human660W-Quad |             |              |             |              |             |
| QC filters applied to genotype data before imputation                 | Individuals removed if inferred sex discordant with recorded sex; if >5% missing genotype data; |                                                                                                         |                                                          |                                                          | Individuals removed if inferred sex discordant with recorded sex; if >5% missing genotype data;<br>SNPs were excluded for minor allele frequency <1% or >5% missing data; |                         |             |              |             |              |             |
| Imputation software                                                   | IMPUTE2                                                                                         |                                                                                                         |                                                          |                                                          |                                                                                                                                                                           |                         |             |              |             |              |             |
| Which reference imputation done to                                    | HapMap3 and 1000 Genomes Project Phase pilot (June 2010)                                        | HapMap3 and 1000 Genomes Project Phase pilot (June 2010) or 1000 Genomes Integrated Release (June 2011) | HapMap3 and 1000 Genomes Project Phase pilot (June 2010) | 1000 Genomes Phase 1 integrated variant set (March 2012) |                                                                                                                                                                           |                         |             |              |             |              |             |

| C. Cohorts contributing data for the WMH in ischemic stroke phenotype |                                                                                                                                                                                                                                                                                                                                                                                                                                                                                                                                                                                                                                                                                                                                                                                                                                                      |        |       |      |                                                                                                                                                                                                                               |        |      |                 |              |                 |              |
|-----------------------------------------------------------------------|------------------------------------------------------------------------------------------------------------------------------------------------------------------------------------------------------------------------------------------------------------------------------------------------------------------------------------------------------------------------------------------------------------------------------------------------------------------------------------------------------------------------------------------------------------------------------------------------------------------------------------------------------------------------------------------------------------------------------------------------------------------------------------------------------------------------------------------------------|--------|-------|------|-------------------------------------------------------------------------------------------------------------------------------------------------------------------------------------------------------------------------------|--------|------|-----------------|--------------|-----------------|--------------|
| Cohort name                                                           | ASGC                                                                                                                                                                                                                                                                                                                                                                                                                                                                                                                                                                                                                                                                                                                                                                                                                                                 | GASROS | SWISS | ISGS | Edinburgh                                                                                                                                                                                                                     | Milano | SGUL | Oxford<br>FLAIR | Oxford<br>T2 | Munich<br>FLAIR | Munich<br>T2 |
| Imputation quality metric reported                                    | IMPUTE info score & PLINK info score                                                                                                                                                                                                                                                                                                                                                                                                                                                                                                                                                                                                                                                                                                                                                                                                                 |        |       |      |                                                                                                                                                                                                                               |        |      |                 |              |                 |              |
| QC filtering applied to imputed variants                              | Removed SNPs with IMPUTE info score <0.3 and SNPs with MAF <1%                                                                                                                                                                                                                                                                                                                                                                                                                                                                                                                                                                                                                                                                                                                                                                                       |        |       |      |                                                                                                                                                                                                                               |        |      |                 |              |                 |              |
| Software and statistical model used for association analyzed          | WMHV from the hemisphere contralateral to acute ischemic stroke was doubled to obtain whole brain values and adjusted for normal inter-individual variation in head size. Values were natural log transformed to a normal distribution. Within each group, rank- transformed residuals were derived from a linear regression model predicting WMHV with age, sex, and the first 2 ancestry principle components as covariates in GenABEL. Thus, the phenotype was adjusted for age because WMHV is highly age dependent. Principal components, derived using EIGENSTRAT, were included to correct for potential population stratification. Association analysis was undertaken in PLINK using pseudodosages, a fractional count of 0 to 1 alleles for each genotype weighted by imputation probability, within a linear regression (additive) model. |        |       |      |                                                                                                                                                                                                                               |        |      |                 |              |                 |              |
| Handling of population stratification                                 | Principal component analysis. Remotion of population outliers by visual inspection of PC1*PC2 plot, followed by inclusion of PC1-PC4 into regression models.                                                                                                                                                                                                                                                                                                                                                                                                                                                                                                                                                                                                                                                                                         |        |       |      | 2 ancestry informative principal components covariates were included in the model used to derive the WMH phenotype                                                                                                            |        |      |                 |              |                 |              |
| HWE                                                                   | Excluded if HWE $p<1\times10^{-6}$                                                                                                                                                                                                                                                                                                                                                                                                                                                                                                                                                                                                                                                                                                                                                                                                                   |        |       |      |                                                                                                                                                                                                                               |        |      |                 |              |                 |              |
| Adjusting for cryptic or overt relatedness                            | Excluded individuals with an inferred first- or second-degree relative in the sample identified on the basis of pairwise allele sharing estimates (estimated genome proportion shared identical by descent) $\pi>0.2$                                                                                                                                                                                                                                                                                                                                                                                                                                                                                                                                                                                                                                |        |       |      | To obtain a set of putatively unrelated individuals, a hidden Markov model (HMM) was used to infer identity by descent and then individuals were removed iteratively to obtain a set with pairwise identity by descent of <5% |        |      |                 |              |                 |              |
| Strand and build of the human genome on which results are provided    | + strand, build 37/hg19                                                                                                                                                                                                                                                                                                                                                                                                                                                                                                                                                                                                                                                                                                                                                                                                                              |        |       |      |                                                                                                                                                                                                                               |        |      |                 |              |                 |              |

<sup>1</sup>HB: hospital-based stroke study; PB: population-based stroke study  
 SGUL: ST George's University London

| <b>D. Cohorts contributing data for the WMH in the population phenotype</b> |                                                                                                                                                                                                                                                                                                                                                                                                                                                                                                                                                                                                                                                                                                                                |                                                   |                                     |                              |                             |                              |                            |
|-----------------------------------------------------------------------------|--------------------------------------------------------------------------------------------------------------------------------------------------------------------------------------------------------------------------------------------------------------------------------------------------------------------------------------------------------------------------------------------------------------------------------------------------------------------------------------------------------------------------------------------------------------------------------------------------------------------------------------------------------------------------------------------------------------------------------|---------------------------------------------------|-------------------------------------|------------------------------|-----------------------------|------------------------------|----------------------------|
| Cohort name                                                                 | ARIC                                                                                                                                                                                                                                                                                                                                                                                                                                                                                                                                                                                                                                                                                                                           | CHS                                               | FHS                                 | Rotterdam Study I            | Rotterdam Study II          | AGES                         | ASPS                       |
|                                                                             | <b>STUDY INFORMATION</b>                                                                                                                                                                                                                                                                                                                                                                                                                                                                                                                                                                                                                                                                                                       |                                                   |                                     |                              |                             |                              |                            |
| Study design                                                                | Prospective population-based cohort studies                                                                                                                                                                                                                                                                                                                                                                                                                                                                                                                                                                                                                                                                                    |                                                   |                                     |                              |                             |                              |                            |
| Study inclusion and exclusion criteria                                      | In all cohorts, participants were excluded if they lacked information on MRI, genotypes, or both, or if they suffered a stroke or transient ischemic attack prior to MRI. In addition, CHS did not genotype participants with clinical cardiovascular disease at baseline. ASPS and RS did not perform MRI scans in participants with dementia, and FHS analyses excluded participants who had dementia at the time of MRI.                                                                                                                                                                                                                                                                                                    |                                                   |                                     |                              |                             |                              |                            |
| WMH quantification method used                                              | In AGES-Reykjavik, ASPS, FHS, and Rotterdam, WMH volume was estimated on a quantitative scale using custom-written computer programs based on an automatic segmentation algorithm or a semiautomatic segmentation analysis involving operator-guided removal of nonbrain elements. In ARIC and CHS, WMH volume was estimated on a semiquantitative 10-point scale by visual comparison with 8 templates that successively increased from barely detectable white matter lesions to extensive, confluent abnormalities. Study participants' brain images were compared with the reference standards after aligning them to approximately the same apparent size. Hence, visual grades are inherently normalized for brain size. |                                                   |                                     |                              |                             |                              |                            |
| MRI scanner used                                                            | General Electric or Picker 1.5 Tesla scanners                                                                                                                                                                                                                                                                                                                                                                                                                                                                                                                                                                                                                                                                                  | 1.5T General Electric or Picker or 0.35 T Toshiba | 1 or 1.5 T Siemens Magnetom scanner | 1.5 T Siemens Vision scanner | 1.5 T GE Healthcare scanner | 1.5 T Signa TwinSpeed system | 1.5 T Gyroscan S15 and ACS |
| MRI sequence used for assessing WMH                                         | T1- and T2-weighted scans in the axial plane were obtained for all participants. These were complemented by either scans obtained with fluid attenuation inversion recovery or proton density sequences to allow better separation of white matter hyperintensities and cerebrospinal fluid.                                                                                                                                                                                                                                                                                                                                                                                                                                   |                                                   |                                     |                              |                             |                              |                            |
| Key study references                                                        | Fornage M et al, Annals of Neurology 2011(8)                                                                                                                                                                                                                                                                                                                                                                                                                                                                                                                                                                                                                                                                                   |                                                   |                                     |                              |                             |                              |                            |
|                                                                             | <b>SUBJECTS' CHARACTERISTICS</b>                                                                                                                                                                                                                                                                                                                                                                                                                                                                                                                                                                                                                                                                                               |                                                   |                                     |                              |                             |                              |                            |
| Ancestry of study sample                                                    | European ancestry                                                                                                                                                                                                                                                                                                                                                                                                                                                                                                                                                                                                                                                                                                              |                                                   |                                     |                              |                             |                              |                            |
| Number of cases in the study assessed for WMH                               | 798                                                                                                                                                                                                                                                                                                                                                                                                                                                                                                                                                                                                                                                                                                                            | 2184                                              | 2200                                | 380                          | 567                         | 2467                         | 765                        |

| D. Cohorts contributing data for the WMH in the population phenotype |                                                                                                                                                                                                                                                                                                                                                                                                    |                                 |                                                                                   |                                   |                                   |                                 |                            |
|----------------------------------------------------------------------|----------------------------------------------------------------------------------------------------------------------------------------------------------------------------------------------------------------------------------------------------------------------------------------------------------------------------------------------------------------------------------------------------|---------------------------------|-----------------------------------------------------------------------------------|-----------------------------------|-----------------------------------|---------------------------------|----------------------------|
| Cohort name                                                          | ARIC                                                                                                                                                                                                                                                                                                                                                                                               | CHS                             | FHS                                                                               | Rotterdam Study I                 | Rotterdam Study II                | AGES                            | ASPS                       |
| Age of cases assessed for WMH (mean $\pm$ SD)                        | 63 $\pm$ 4                                                                                                                                                                                                                                                                                                                                                                                         | 72 $\pm$ 5                      | 64 $\pm$ 11                                                                       | 73 $\pm$ 8                        | 67 $\pm$ 5                        | 76 $\pm$ 5                      | 65 $\pm$ 8                 |
|                                                                      | GENOTYPING INFORMATION                                                                                                                                                                                                                                                                                                                                                                             |                                 |                                                                                   |                                   |                                   |                                 |                            |
| GWAS panel used                                                      | Affymetrix GeneChip SNP Array 6.0                                                                                                                                                                                                                                                                                                                                                                  | Illumina Human 370-Duo BeadChip | Affymetrix GeneChip Human mapping 500K Array Set and 50K Human gene Focused panel | Illumina HumanHap550 Duo BeadChip | Illumina HumanHap550 Duo BeadChip | Illumina Human 370-Duo BeadChip | Illumina 610-Quad BeadChip |
| QC filters applied to genotype data before imputation                | Participant-specific quality control filters were applied based on missing call rate, cryptic relatedness, and number of Mendelian errors per individual. SNP-specific quality controls included filters for call rate, minor allele frequency, Hardy-Weinberg equilibrium, differential missingness by outcome or genotype.                                                                       |                                 |                                                                                   |                                   |                                   |                                 |                            |
| Imputation software                                                  | MaCH (v1.0.15 or 1.0.16)                                                                                                                                                                                                                                                                                                                                                                           | BIM-BAM 15                      | MaCH (v1.0.15 or 1.0.16)                                                          |                                   |                                   |                                 |                            |
| Which reference imputation done to                                   | HapMap2 CEU #22; +strand of NCBI build 36                                                                                                                                                                                                                                                                                                                                                          | +strand of NCBI build 35        | HapMap2 CEU #22; +strand of NCBI build 36                                         |                                   |                                   |                                 |                            |
| Imputation quality metric reported                                   | O/E ratio and oevar                                                                                                                                                                                                                                                                                                                                                                                |                                 |                                                                                   |                                   |                                   |                                 |                            |
| QC filtering applied to imputed variants                             | Excluded SNPs with O/E ratio & oevar <0.3 and MAF<1%                                                                                                                                                                                                                                                                                                                                               |                                 |                                                                                   |                                   |                                   |                                 |                            |
| Software and statistical model used for association analyzed         | Within each study, a linear regression model was used to evaluate the association of the natural log-transformed volume of WMHs (log[WMH + 1]) with the number of minor alleles (0 to 2) at each SNP. Analyses were adjusted only for age, sex, and total intracranial volume (except in ASPS, ARIC, and CHS). ARIC and CHS also adjusted for study site, and FHS adjusted for familial structure. |                                 |                                                                                   |                                   |                                   |                                 |                            |
| HWE                                                                  | Excluded if Hardy-Weinberg $p < 1 \times 10^{-5}$ in CHS and $p < 1 \times 10^{-6}$ in AGES-Reykjavik, ARIC, ASPS, FHS, and Rotterdam                                                                                                                                                                                                                                                              |                                 |                                                                                   |                                   |                                   |                                 |                            |

| D. Cohorts contributing data for the WMH in the population phenotype     |                                                                                                                                                                                                                                                   |     |     |                   |                    |      |      |
|--------------------------------------------------------------------------|---------------------------------------------------------------------------------------------------------------------------------------------------------------------------------------------------------------------------------------------------|-----|-----|-------------------|--------------------|------|------|
| Cohort name                                                              | ARIC                                                                                                                                                                                                                                              | CHS | FHS | Rotterdam Study I | Rotterdam Study II | AGES | ASPS |
| Adjusting for cryptic or overt relatedness and population stratification | Studies were screened for latent population substructure, including cryptic relatedness, using suitable programs: EIGENSTRAT in ARIC, FHS and AGES-Reykjavik, an IBD matrix in ASPS and Rotterdam, and using principal component analysis in CHS. |     |     |                   |                    |      |      |
| Strand and build of the human genome                                     | + strand; hg18                                                                                                                                                                                                                                    |     |     |                   |                    |      |      |

AGES: Aging Gene-Environment Susceptibility-Reykjavik Study

ASPS: Austrian Stroke Prevention Study

## Supplementary table e-2.

A. Original measures of association ( $\beta$ ) and the derived odds ratios (ORs).

|                             | Phenotype           | $\beta$ (minor allele) | SE of $\beta$ | OR (minor allele) | 95% CI of OR |
|-----------------------------|---------------------|------------------------|---------------|-------------------|--------------|
| rs 9521732 (minor allele A) | All ICH             | 0.1548                 | 0.0519        | 1.17              | 1.05 to 1.29 |
|                             | Deep ICH            | 0.2451                 | 0.0614        | 1.28              | 1.13 to 1.44 |
|                             | Lobar ICH           | 0.0489                 | 0.068         | 1.05              | 0.92 to 1.20 |
|                             | All IS              | 0.0261                 | 0.0161        | 1.03              | 0.99 to 1.06 |
|                             | CE IS               | 0.022                  | 0.0321        | 1.02              | 0.96 to 1.09 |
|                             | LVD IS              | -0.0465                | 0.0354        | 0.95              | 0.89 to 1.02 |
|                             | Lacunar IS          | 0.0858                 | 0.0357        | 1.09              | 1.02 to 1.17 |
|                             | WMH in IS*          | 0.0707                 | 0.0289        | 1.07              | 1.01 to 1.14 |
|                             | WMH in population * | 0.0088                 | 0.008         | 1.01              | 0.99 to 1.04 |
| rs 9521733 (minor allele C) | All ICH             | 0.1706                 | 0.0521        | 1.19              | 1.07 to 1.31 |
|                             | Deep ICH            | 0.2547                 | 0.0614        | 1.29              | 1.14 to 1.46 |
|                             | Lobar ICH           | 0.0674                 | 0.068         | 1.07              | 0.94 to 1.22 |
|                             | All IS              | 0.0294                 | 0.0164        | 1.03              | 1.00 to 1.06 |
|                             | CE IS               | 0.0151                 | 0.0326        | 1.02              | 0.95 to 1.08 |
|                             | LVD IS              | -0.0466                | 0.0353        | 0.95              | 0.89 to 1.02 |
|                             | Lacunar IS          | 0.0979                 | 0.0365        | 1.10              | 1.03 to 1.18 |
|                             | WMH in IS*          | 0.0691                 | 0.0288        | 1.07              | 1.01 to 1.13 |
|                             | WMH in population * | 0.0088                 | 0.008         | 1.01              | 0.99 to 1.04 |
| rs 9515199 (minor allele C) | All ICH             | 0.1554                 | 0.0519        | 1.17              | 1.06 to 1.29 |
|                             | Deep ICH            | 0.2465                 | 0.0614        | 1.28              | 1.14 to 1.44 |
|                             | Lobar ICH           | 0.0487                 | 0.068         | 1.05              | 0.92 to 1.20 |
|                             | All IS              | 0.0308                 | 0.0165        | 1.03              | 1.00 to 1.07 |
|                             | CE IS               | 0.02                   | 0.0332        | 1.02              | 0.96 to 1.09 |
|                             | LVD IS              | -0.0406                | 0.036         | 0.96              | 0.89 to 1.03 |
|                             | Lacunar IS          | 0.0891                 | 0.0365        | 1.09              | 1.02 to 1.17 |
|                             | WMH in IS*          | 0.0707                 | 0.0289        | 1.07              | 1.01 to 1.14 |
|                             | WMH in population * | 0.0088                 | 0.008         | 1.01              | 0.99 to 1.04 |

We calculated the ORs from the  $\beta$ -coefficients by using the EXP function in Excel (inverse of the natural logarithm). We calculated the 95% CIs of the ORs by first calculating the error factor ( $EF = \exp(1.96 \cdot SE)$ ) and then dividing and multiplying the OR with the EF to calculate the lower and upper 95% CIs respectively.

\* For WMH cohorts the ORs represent the OR per 1 unit standard deviation (SD) change in WMH volume. For WMH in ischemic stroke cohorts, we calculated this from the  $\beta$ -coefficient by simply using the EXP function in Excel, as the WMH values had a SD of 1. For WMH in population cohorts, we divided the  $\beta$ -coefficients and SEs by their respective pooled SD across cohorts (0.684) first and then used the transformed  $\beta$ -coefficient and SE to calculate the respective ORs and their 95% CIs.

### B. Imputed and directly genotyped SNPs.

| Phenotype                 | Study              | Imputation quality measures |                   |                   |
|---------------------------|--------------------|-----------------------------|-------------------|-------------------|
|                           |                    | rs9521732                   | rs9521733         | rs9515199         |
| ICH                       | ISGC               | 1 <sup>a</sup>              | G                 | 1 <sup>a</sup>    |
|                           | GOCHA              | 1 <sup>a</sup>              | G                 | 0.99 <sup>a</sup> |
|                           | GERFHS             | G                           | G                 | 1 <sup>a</sup>    |
| ISCHEMIC STROKE           | ARIC               | G                           | n/a               | 1 <sup>b</sup>    |
|                           | ASGC               | 0.96 <sup>b</sup>           | G                 | 0.97 <sup>b</sup> |
|                           | Brains             | 0.99 <sup>b</sup>           | G                 | 0.98 <sup>b</sup> |
|                           | CHS                | 0.92 <sup>c</sup>           | G                 | 0.92 <sup>c</sup> |
|                           | deCODE             | 0.99 <sup>d</sup>           | G                 | 0.99 <sup>d</sup> |
|                           | GASROS             | 1 <sup>b</sup>              | 0.99 <sup>b</sup> | n/a               |
|                           | GEOS               | G                           | n/a               | n/a               |
|                           | HVH                | 0.92 <sup>c</sup>           | G                 | 0.91 <sup>c</sup> |
|                           | ISGS & SWISS       | 0.98 <sup>b</sup>           | G                 | 0.98 <sup>b</sup> |
|                           | Milano             | 0.97 <sup>b</sup>           | 1 <sup>b</sup>    | 0.97 <sup>b</sup> |
|                           | WTCCC2_D           | 0.98 <sup>b</sup>           | G                 | 0.97 <sup>b</sup> |
|                           | WTCCC2_UK          | 0.99 <sup>b</sup>           | G                 | 0.99 <sup>b</sup> |
|                           | FHS                | 0.94 <sup>b</sup>           | 0.94 <sup>b</sup> | 0.94 <sup>b</sup> |
|                           | HPS                | 0.97 <sup>b</sup>           | G                 | 0.97 <sup>b</sup> |
|                           | Rotterdam          | 0.99 <sup>b</sup>           | 1 <sup>b</sup>    | 0.99 <sup>b</sup> |
| WMH in symptomatic stroke | Edinburgh          | 0.97 <sup>d</sup>           | G                 | 0.97 <sup>d</sup> |
|                           | Munich_T2          | 0.90 <sup>d</sup>           | G                 | 0.90 <sup>d</sup> |
|                           | Munich_FLAIR       | 1 <sup>d</sup>              | G                 | 1 <sup>d</sup>    |
|                           | Oxford_T2          | 0.94 <sup>d</sup>           | G                 | 0.94 <sup>d</sup> |
|                           | Oxford_FLAIR       | 0.77 <sup>d</sup>           | G                 | 0.77 <sup>d</sup> |
|                           | SGUL               | 0.98 <sup>d</sup>           | G                 | 0.98 <sup>d</sup> |
|                           | Milano             | 0.80 <sup>d</sup>           | 0.84 <sup>d</sup> | 0.80 <sup>d</sup> |
|                           | ASGC               | 1 <sup>d</sup>              | 1 <sup>d</sup>    | 1 <sup>d</sup>    |
|                           | GASROS_affy        | G                           | G                 | 1 <sup>d</sup>    |
|                           | GASROS_illumina    | 1 <sup>d</sup>              | G                 | 1 <sup>d</sup>    |
|                           | GASROS_omni        | G                           | 1 <sup>d</sup>    | 1 <sup>d</sup>    |
|                           | ISGC-SWISS         | 0.93 <sup>d</sup>           | G                 | 0.93 <sup>d</sup> |
| WMH in population         | AGES               | 0.99 <sup>b</sup>           | n/a               | 0.98 <sup>b</sup> |
|                           | ARIC               | G                           | n/a               | 1 <sup>b</sup>    |
|                           | CHS                | 0.92 <sup>c</sup>           | n/a               | 0.92 <sup>c</sup> |
|                           | FHS                | 0.94 <sup>b</sup>           | n/a               | 0.94 <sup>b</sup> |
|                           | Rotterdam Study I  | 0.99 <sup>b</sup>           | n/a               | 0.99 <sup>b</sup> |
|                           | Rotterdam Study II | 0.99 <sup>b</sup>           | n/a               | 0.99 <sup>b</sup> |
|                           | ASPS               | 0.98 <sup>b</sup>           | n/a               | 0.98 <sup>b</sup> |

G: directly genotyped; n/a: SNP not available for the study.

Imputation quality numbers provided reflect the minimum quality measure across sub-phenotypes, rounded to 2 decimal places.

<sup>a</sup> PLINK info <sup>b</sup> MaCH oevar <sup>c</sup> BIMBAM O/E ratio <sup>d</sup> IMPUTE info

## Supplementary table e-3.

A. Functional annotation of SNPs in moderate LD ( $r^2 > 0.3$ ) with rs9521732, rs9521733 and rs9515199\*.

| Gene   | hg 19       | Consequence<br>Ensembl                   | Consequence<br>SeattleSeq | Haploreg: dbSNP<br>functional<br>annotation |
|--------|-------------|------------------------------------------|---------------------------|---------------------------------------------|
| COL4A2 | rs111269249 | -                                        | -                         | intronic                                    |
| COL4A2 | rs115945569 | -                                        | -                         | intronic                                    |
| COL4A2 | rs11619425  | intron_variant                           | intron-variant            | intronic                                    |
| COL4A2 | rs11619427  | intron_variant                           | intron-variant            | intronic                                    |
| COL4A2 | rs11619430  | intron_variant                           | intron-variant            | intronic                                    |
| COL4A2 | rs11838637  | intron_variant                           | intron-variant            | intronic                                    |
| COL4A2 | rs11838776  | intron_variant                           | intron-variant            | intronic                                    |
| COL4A2 | rs12853693  | intron_variant                           | intron-variant            | intronic                                    |
| COL4A2 | rs1888004   | intron_variant                           | intron-variant            | intronic                                    |
| COL4A2 | rs1888005   | intron_variant                           | intron-variant            | intronic                                    |
| COL4A2 | rs1927342   | intron_variant                           | intron-variant            | intronic                                    |
| COL4A2 | rs1927343   | -                                        | intron-variant            | intronic                                    |
| COL4A2 | rs1927344   | intron_variant                           | intron-variant            | intronic                                    |
| COL4A2 | rs1927345   | intron_variant                           | intron-variant            | intronic                                    |
| COL4A2 | rs1927346   | intron_variant                           | intron-variant            | intronic                                    |
| COL4A2 | rs1927347   | intron_variant                           | intron-variant            | intronic                                    |
| COL4A2 | rs1927349   | intron_variant                           | intron-variant            | intronic                                    |
| COL4A2 | rs1927355   | intronic<br>downstream_<br>gene_variant† | -                         | intronic                                    |
| COL4A2 | rs1999013   | intron_variant                           | intron-variant            | intronic                                    |
| COL4A2 | rs2149067   | intron_variant                           | intron-variant            | intronic                                    |
| COL4A2 | rs2391825   | intron_variant                           | intron-variant            | intronic                                    |
| COL4A2 | rs34402154  | intron_variant                           | intron-variant            | intronic                                    |
| COL4A2 | rs34992019  | intron_variant                           | intron-variant            | intronic                                    |
| COL4A2 | rs3899318   |                                          | intron-variant            | intronic                                    |
| COL4A2 | rs4283091   | intron_variant                           | intron-variant            | intronic                                    |
| COL4A2 | rs4492912   | intron_variant                           | intron-variant            | intronic                                    |
| COL4A2 | rs4547215   | intron_variant                           | intron-variant            | intronic                                    |
| COL4A2 | rs4586292   | intron_variant                           | intron-variant            | intronic                                    |
| COL4A2 | rs4771674   | intron_variant                           | intron-variant            | intronic                                    |
| COL4A2 | rs4771675   | intron_variant                           | intron-variant            | intronic                                    |
| COL4A2 | rs4771676   | intron_variant                           | intron-variant            | intronic                                    |
| COL4A2 | rs4773157   | intron_variant                           | intron-variant            | intronic                                    |
| COL4A2 | rs4773169   | intron_variant                           | intron-variant            | intronic                                    |
| COL4A2 | rs4773170   | intron_variant                           | intron-variant            | intronic                                    |
| COL4A2 | rs4773171   | -                                        | intron-variant            | intronic                                    |
| COL4A2 | rs4773173   | intron_variant                           | intron-variant            | intronic                                    |
| COL4A2 | rs4773174   | intron_variant                           | intron-variant            | intronic                                    |
| COL4A2 | rs4773177   | intron_variant                           | intron-variant            | intronic                                    |
| COL4A2 | rs55940034  | intron_variant                           | intron-variant            | intronic                                    |
| COL4A2 | rs61963197  | intron_variant                           | intron-variant            | intronic                                    |

| Gene          | hg 19            | Consequence<br>Ensembl | Consequence<br>SeattleSeq | Haploreg: dbSNP<br>functional<br>annotation |
|---------------|------------------|------------------------|---------------------------|---------------------------------------------|
| COL4A2        | rs7318424        | -                      | intron-variant            | intronic                                    |
| COL4A2        | rs7318742        | intron_variant         | intron-variant            | intronic                                    |
| COL4A2        | rs7321362        | intron_variant         | intron-variant            | intronic                                    |
| COL4A2        | rs7323228        | intron_variant         | intron-variant            | intronic                                    |
| COL4A2        | rs7326145        | -                      | intron-variant            | intronic                                    |
| COL4A2        | rs7328731        | intron_variant         | intron-variant            | intronic                                    |
| COL4A2        | rs7333596        | intron_variant         | intron-variant            | intronic                                    |
| COL4A2        | rs7333748        | -                      | intron-variant            | intronic                                    |
| COL4A2        | rs7334022        | intron_variant         | intron-variant            | intronic                                    |
| COL4A2        | rs750598         | intron_variant         | intron-variant            | intronic                                    |
| COL4A2        | rs7982993        | -                      | intron-variant            | intronic                                    |
| COL4A2        | rs7983374        | intron_variant         | intron-variant            | intronic                                    |
| COL4A2        | rs7990844        | intron_variant         | intron-variant            | intronic                                    |
| COL4A2        | rs7991842        | intron_variant         | intron-variant            | intronic                                    |
| COL4A2        | rs7999034        | intron_variant         | intron-variant            | intronic                                    |
| COL4A2        | rs872587         | -                      | intron-variant            | intronic                                    |
| COL4A2        | rs872588         | intron_variant         | intron-variant            | intronic                                    |
| COL4A2        | rs872589         | intron_variant         | intron-variant            | intronic                                    |
| COL4A2        | rs913746         | -                      | intron-variant            | intronic                                    |
| COL4A2        | rs9284253        | intron_variant         | intron-variant            | intronic                                    |
| COL4A2        | rs9301454        | intron_variant         | intron-variant            | intronic                                    |
| COL4A2        | rs9515195        | -                      | intron-variant            | intronic                                    |
| COL4A2        | rs9515196        | -                      | intron-variant            | intronic                                    |
| COL4A2        | rs9515197        | intron_variant         | intron-variant            | intronic                                    |
| <b>COL4A2</b> | <b>rs9515199</b> | <b>intron_variant</b>  | <b>intron-variant</b>     | <b>intronic</b>                             |
| COL4A2        | rs9515201        | -                      | intron-variant            | intronic                                    |
| COL4A2        | rs9515204        | intron_variant         | intron-variant            | intronic                                    |
| COL4A2        | rs9521717        | -                      | intron-variant            | intronic                                    |
| COL4A2        | rs9521718        | -                      | intron-variant            | intronic                                    |
| COL4A2        | rs9521719        | intron_variant         | intron-variant            | intronic                                    |
| COL4A2        | rs9521720        | intron_variant         | intron-variant            | intronic                                    |
| COL4A2        | rs9521721        | -                      | intron-variant            | intronic                                    |
| COL4A2        | rs9521729        | intron_variant         | intron-variant            | intronic                                    |
| COL4A2        | rs9521730        | -                      | intron-variant            | intronic                                    |
| <b>COL4A2</b> | <b>rs9521732</b> | <b>intron_variant</b>  | <b>intron-variant</b>     | <b>intronic</b>                             |
| <b>COL4A2</b> | <b>rs9521733</b> | <b>intron_variant</b>  | <b>intron-variant</b>     | <b>intronic</b>                             |
| COL4A2        | rs9521734        | intron_variant         | intron-variant            | intronic                                    |
| COL4A2        | rs9521735        | intron_variant         | intron-variant            | intronic                                    |
| COL4A2        | rs9521739        | intron_variant         | intron-variant            | intronic                                    |
| COL4A2        | rs9521740        | intron_variant         | intron-variant            | intronic                                    |
| COL4A2        | rs9521742        | -                      | intron-variant            | intronic                                    |
| COL4A2        | rs9521743        | intron_variant         | intron-variant            | intronic                                    |
| COL4A2        | rs9521744        | intron_variant         | intron-variant            | intronic                                    |
| COL4A2        | rs9521746        | intron_variant         | intron-variant            | intronic                                    |
| COL4A2        | rs9521747        | intron_variant         | intron-variant            | intronic                                    |
| COL4A2        | rs9521748        | intron_variant         | intron-variant            | intronic                                    |

| Gene   | hg 19     | Consequence<br>Ensembl | Consequence<br>SeattleSeq | Haploreg: dbSNP<br>functional<br>annotation |
|--------|-----------|------------------------|---------------------------|---------------------------------------------|
| COL4A2 | rs952359  | intron_variant         | intron-variant            | intronic                                    |
| COL4A2 | rs9555692 | -                      | intron-variant            | intronic                                    |
| COL4A2 | rs9555694 | -                      | intron-variant            | intronic                                    |
| COL4A2 | rs9555695 | intron_variant         | intron-variant            | intronic                                    |
| COL4A2 | rs9559780 | -                      | intron-variant            | intronic                                    |
| COL4A2 | rs9559781 | -                      | intron-variant            | intronic                                    |
| COL4A2 | rs9559788 | -                      | intron-variant            | intronic                                    |
| COL4A2 | rs9583489 | intron_variant         | intron-variant            | intronic                                    |
| COL4A2 | rs9588151 | intron_variant         | intron-variant            | Intronic                                    |

∴ SNP not included in database

\* the three SNPs significantly associated with deep ICH are shown in bold.

† A sequence variant located 3' of a gene

**B. Functional annotation of SNPs in high LD ( $r^2 > 0.9$ ) with rs9521732, rs9521733 and rs9515199: Regulome db database results.**

| HG19             | Regulome db score | Motifs <sup>1</sup> | Histone modification <sup>2</sup> | Protein binding <sup>3</sup> | Chromatin structure <sup>4</sup> |
|------------------|-------------------|---------------------|-----------------------------------|------------------------------|----------------------------------|
| <b>rs9521732</b> | no data           | n/a                 | n/a                               | n/a                          | n/a                              |
| <b>rs9515199</b> | no data           | n/a                 | n/a                               | n/a                          | n/a                              |
| rs9521735        | no data           | n/a                 | n/a                               | n/a                          | n/a                              |
| rs4771674        | no data           | n/a                 | n/a                               | n/a                          | n/a                              |
| <b>rs9521733</b> | 5                 | -                   | ✓                                 | -                            | ✓                                |
| rs9521734        | 6                 | ✓                   | ✓                                 | -                            | -                                |
| rs1999013        | 5                 | ✓                   | ✓                                 | -                            | ✓                                |
| rs9555695        | 4                 | -                   | ✓                                 | ✓                            | ✓                                |

n/a: not applicable; - : no evidence; ✓: evidence

Gray boxes indicate that there is some evidence for this functional annotation based on experiments done on more relevant tissues: brain, spinal cord or blood vessel tissue.

Regulome db score: The scoring system represents with increasing confidence that a variant lies in a functional location and is likely to result in a functional consequence (lower scores indicate increasing evidence for a variant to be located in a functional region.)

1: Likely to affect binding and linked to expression of a gene target

2: Likely to affect binding

3: Less likely to affect binding

4-6: Minimal binding evidence (lack evidence of the variant actually disrupting the site of binding)

<sup>1</sup>Motifs: the SNP is located in an area of short recurring patterns in DNA (motif) thought to have a regulatory function and hence may predict transcription factor binding sites.

<sup>2</sup>Histone modification: the SNP is located in an area of histone modification. Histones are proteins that associate with DNA in the nucleus and help condense it into chromatin. Histone modifications are a range of post-translational modifications to the N-terminal tails of the histones in chromatin, which include a series of methylations and acetylations at defined lysine and arginine residues. Histone modification profiles are associated with differences in gene transcription and hence can be used as a generic tool to identify functional elements in the genome.

<sup>3</sup>Protein binding: the SNP is located in an area binding a transcription factor.

<sup>4</sup>Chromatin structure: the SNP is located in an area of possible chromatin accessibility, suggesting the area has a regulatory function. Chromatin is a complex of DNA and proteins that forms chromosomes within the nucleus of eukaryotic cells.

## Reference List

- (1) Falcone GJ, Biffi A, Devan WJ, et al. Burden of Blood Pressure-Related Alleles Is Associated With Larger Hematoma Volume and Worse Outcome in Intracerebral Hemorrhage. *Stroke* 2013;44:321-326.
- (2) Woo D, Falcone GJ, Devan WJ, et al. Meta-analysis of genome-wide association studies identifies 1q22 as a novel susceptibility locus for intracerebral hemorrhage. *American Journal of Human Genetics* 2014;pii: S0002-9297(14)00070-6. doi: 10.1016/j.ajhg.2014.02.012. [Epub ahead of print].
- (3) Woo D, Sauerbeck LR, Kissela BM, et al. Genetic and Environmental Risk Factors for Intracerebral Hemorrhage: Preliminary Results of a Population-Based Study. *Stroke* 2002;33:1190-1196.
- (4) Traylor M, Farrall M, Holliday EG, et al. Genetic risk factors for ischaemic stroke and its subtypes (the METASTROKE Collaboration): a meta-analysis of genome-wide association studies. *Lancet Neurology* 2012;11:951-962
- (5) Servin B, Stephens M. Imputation-Based Analysis of Association Studies: Candidate Regions and Quantitative Traits. *PLoS Genetics* 2007;3:e114.
- (6) Adib-Samii P, Rost N, Traylor M, et al. 17q25 Locus Is Associated With White Matter Hyperintensity Volume in Ischaemic Stroke, But Not With Lacunar Stroke Status. *Stroke* 2013;44:1609-1615.
- (7) Rost NS, Rahman RM, Biffi A, et al. White matter hyperintensity volume is increased in small vessel stroke subtypes. *Neurology* 2010;75:1670-1677.
- (8) Fornage M, Debette S, Bis JC, et al. Genome-Wide Association Studies of Cerebral White Matter Lesion Burden: The CHARGE Consortium. *Annals of Neurology* 2011;69:928-939.
